# Supplementary material for: Smoking Behaviors and Prognosis in Patients With Non–Muscle-Invasive Bladder Cancer in the Be-Well Study
Source: PubMed Central journal article supplement (PMC9713602; doi:10.1001/jamanetworkopen.2022.44430), 2022-11-30
Supplement: jamanetwopen-e2244430-s001.pdf [file jamanetwopen-e2244430-s001.pdf]

## Supplemental Online Content

Kwan ML, Haque R, Young-Wolff KC, et al. Smoking behaviors and prognosis in patients with non–muscle-invasive bladder cancer in the Be-Well study. *JAMA Netw Open*. 2022;5(11):e2244430. doi:10.1001/jamanetworkopen.2022.44430

**eTable 1.** Be-Well Study Baseline Interview Smoking Questions

**eTable 2.** Characteristics of Be-Well Study Participants by Marijuana Smoking Behavior

**eTable 3.** Associations Between Smoking Behaviors and Risk of Progression in the Be-Well Study

This supplemental material has been provided by the authors to give readers additional information about their work.

**eTable 1.** Be-Well Study Baseline Interview Smoking Questions

| <b>1. Have you ever smoked at least 100 cigarettes in your entire life?</b>                                                                    |                                                                                                                                    | 1 <input type="checkbox"/> Yes<br>0 <input type="checkbox"/> No → <b>Go to Question 5</b><br>8 <input type="checkbox"/> Don't Know → <b>Go to Question 5</b><br>9 <input type="checkbox"/> Refused → <b>Go to Question 5</b>                                                                                                                                                                                                                                                                                                                                                                                |                                                      |                                     |
|------------------------------------------------------------------------------------------------------------------------------------------------|------------------------------------------------------------------------------------------------------------------------------------|-------------------------------------------------------------------------------------------------------------------------------------------------------------------------------------------------------------------------------------------------------------------------------------------------------------------------------------------------------------------------------------------------------------------------------------------------------------------------------------------------------------------------------------------------------------------------------------------------------------|------------------------------------------------------|-------------------------------------|
| <b>2. How old were you when you first started smoking cigarettes on a regular basis (that is at least once/week for three months or more)?</b> |                                                                                                                                    | _ _  <b>Age started smoking cigarettes</b>                                                                                                                                                                                                                                                                                                                                                                                                                                                                                                                                                                  |                                                      |                                     |
| <b>3. Do you currently smoke?</b>                                                                                                              |                                                                                                                                    | 1 <input type="checkbox"/> Yes, every day<br>2 <input type="checkbox"/> Yes, some days →<br><b>3a. On how many of the past 30 days did you smoke a cigarette?</b><br> _ _  <b>Days</b><br><br>0 <input type="checkbox"/> No, not at all →<br><b>3b. At what age did you last stop smoking cigarettes?</b><br> _ _  <b>Age stopped smoking</b><br><br><b>3c. Excluding all the times you may have quit, how long did you smoke cigarettes? (Years)</b><br> _ _  <b>Years</b><br><br><b>3d. Excluding all the times you may have quit, how long did you smoke cigarettes? (Months)</b><br> _ _  <b>Months</b> |                                                      |                                     |
| <b>4. On average, how many cigarettes do/did you smoke each day? (Note to interviewer: 1 pack=20 cigarettes)</b>                               |                                                                                                                                    | _ _ _  <b>Cigarettes per day</b>                                                                                                                                                                                                                                                                                                                                                                                                                                                                                                                                                                            |                                                      |                                     |
| <b>5. Now I am going to ask you some questions about the use of non-cigarette products.</b>                                                    |                                                                                                                                    |                                                                                                                                                                                                                                                                                                                                                                                                                                                                                                                                                                                                             |                                                      |                                     |
| Product                                                                                                                                        | Have you ever used...?                                                                                                             | If yes...                                                                                                                                                                                                                                                                                                                                                                                                                                                                                                                                                                                                   |                                                      |                                     |
|                                                                                                                                                |                                                                                                                                    | Are you currently using...?                                                                                                                                                                                                                                                                                                                                                                                                                                                                                                                                                                                 | For how long have you used...?                       | At what age did you begin using...? |
| <b>a. Pipe to smoke tobacco</b>                                                                                                                | 1 <input type="checkbox"/> Yes<br>0 <input type="checkbox"/> No<br>8 <input type="checkbox"/> DK<br>9 <input type="checkbox"/> Ref | 1 <input type="checkbox"/> Yes<br>0 <input type="checkbox"/> No<br>8 <input type="checkbox"/> DK<br>9 <input type="checkbox"/> Ref                                                                                                                                                                                                                                                                                                                                                                                                                                                                          | _ _ _  <b>Years</b><br><br><br> _ _ _  <b>Months</b> | _ _                                 |

| Product                   | Have you ever used...?                                                                                                             | If yes...                                                                                                                          |                                    |                                     |
|---------------------------|------------------------------------------------------------------------------------------------------------------------------------|------------------------------------------------------------------------------------------------------------------------------------|------------------------------------|-------------------------------------|
|                           |                                                                                                                                    | Are you currently using...?                                                                                                        | For how long have you used...?     | At what age did you begin using...? |
| <b>b. Cigars</b>          | 1 <input type="checkbox"/> Yes<br>0 <input type="checkbox"/> No<br>8 <input type="checkbox"/> DK<br>9 <input type="checkbox"/> Ref | 1 <input type="checkbox"/> Yes<br>0 <input type="checkbox"/> No<br>8 <input type="checkbox"/> DK<br>9 <input type="checkbox"/> Ref | __ __  Years<br><br> __ __  Months | __ __                               |
| <b>c. Chewing tobacco</b> | 1 <input type="checkbox"/> Yes<br>0 <input type="checkbox"/> No<br>8 <input type="checkbox"/> DK<br>9 <input type="checkbox"/> Ref | 1 <input type="checkbox"/> Yes<br>0 <input type="checkbox"/> No<br>8 <input type="checkbox"/> DK<br>9 <input type="checkbox"/> Ref | __ __  Years<br><br> __ __  Months | __ __                               |
| <b>d. Marijuana</b>       | 1 <input type="checkbox"/> Yes<br>0 <input type="checkbox"/> No<br>8 <input type="checkbox"/> DK<br>9 <input type="checkbox"/> Ref | 1 <input type="checkbox"/> Yes<br>0 <input type="checkbox"/> No<br>8 <input type="checkbox"/> DK<br>9 <input type="checkbox"/> Ref | __ __  Years<br><br> __ __  Months | __ __                               |
| <b>e. Snuff</b>           | 1 <input type="checkbox"/> Yes<br>0 <input type="checkbox"/> No<br>8 <input type="checkbox"/> DK<br>9 <input type="checkbox"/> Ref | 1 <input type="checkbox"/> Yes<br>0 <input type="checkbox"/> No<br>8 <input type="checkbox"/> DK<br>9 <input type="checkbox"/> Ref | __ __  Years<br><br> __ __  Months | __ __                               |

| Product                                                                                                           | Have you ever used...?                                                                                                             | If yes...                                                                                                                          |                                        |                                     |
|-------------------------------------------------------------------------------------------------------------------|------------------------------------------------------------------------------------------------------------------------------------|------------------------------------------------------------------------------------------------------------------------------------|----------------------------------------|-------------------------------------|
|                                                                                                                   |                                                                                                                                    | Are you currently using...?                                                                                                        | For how long have you used...?         | At what age did you begin using...? |
| <b>f. Other (e.g., e-cigarettes, snuse, or hookah)</b><br><br><b>f1. Specify other non-cigarette product_____</b> | 1 <input type="checkbox"/> Yes<br>0 <input type="checkbox"/> No<br>8 <input type="checkbox"/> DK<br>9 <input type="checkbox"/> Ref | 1 <input type="checkbox"/> Yes<br>0 <input type="checkbox"/> No<br>8 <input type="checkbox"/> DK<br>9 <input type="checkbox"/> Ref | __ __  Years<br><br><br> __ __  Months | __ __                               |

**eTable 2.** Characteristics of Be-Well Study Participants by Marijuana Smoking Behavior

|                                       | Never Marijuana Use (n=1,107)<br>n (%) | Ever Marijuana Use (n=363)<br>n (%) | p-value <sup>a</sup> |
|---------------------------------------|----------------------------------------|-------------------------------------|----------------------|
| <b>Stage/Grade</b>                    |                                        |                                     |                      |
| LG Ta                                 | 465 (42.0)                             | 166 (45.7)                          | 0.36                 |
| LG T1                                 | 26 (2.4)                               | 17 (4.7)                            |                      |
| HG Ta                                 | 267 (24.1)                             | 85 (23.4)                           |                      |
| HG T1                                 | 293 (26.5)                             | 76 (20.9)                           |                      |
| Tis                                   | 48 (4.3)                               | 15 (4.1)                            |                      |
| Other                                 | 8 (0.7)                                | 4 (1.1)                             |                      |
| <b>Concomitant CIS</b>                |                                        |                                     |                      |
| No                                    | 1,000 (90.3)                           | 329 (90.6)                          | 0.99                 |
| Yes with Ta disease                   | 34 (3.1)                               | 12 (3.3)                            |                      |
| Yes with T1 disease                   | 51 (4.6)                               | 17 (4.7)                            |                      |
| CIS only                              | 22 (2.0)                               | 5 (1.4)                             |                      |
| <b>Chemotherapy (e.g., mitomycin)</b> |                                        |                                     |                      |
| No                                    | 696 (62.9)                             | 198 (54.6)                          | <b>0.01</b>          |
| Yes                                   | 411 (37.1)                             | 165 (45.5)                          |                      |
| <b>Immunotherapy (e.g., BCG)</b>      |                                        |                                     |                      |
| No                                    | 522 (47.2)                             | 181 (49.9)                          | 0.69                 |
| Yes                                   | 585 (52.9)                             | 182 (50.1)                          |                      |
| <b>Sex</b>                            |                                        |                                     |                      |
| Male                                  | 815 (73.6)                             | 312 (86.0)                          | <b>&lt;0.001</b>     |
| Female                                | 292 (26.4)                             | 51 (14.0)                           |                      |
| <b>Race/Ethnicity</b>                 |                                        |                                     |                      |
| White                                 | 872 (78.8)                             | 292 (80.4)                          | <b>0.012</b>         |
| Black or African American             | 53 (4.8)                               | 28 (7.7)                            |                      |
| Hispanic                              | 95 (8.6)                               | 32 (8.8)                            |                      |
| Asian                                 | 66 (6)                                 | 6 (1.7)                             |                      |
| Other (AIAN/PI)                       | 21 (1.9)                               | 5 (1.4)                             |                      |
| <b>Age Group (y)</b>                  |                                        |                                     |                      |
| <50                                   | 33 (3)                                 | 31 (8.5)                            | <b>&lt;0.001</b>     |
| 50-64                                 | 209 (18.9)                             | 146 (40.2)                          |                      |
| 65-79                                 | 595 (53.8)                             | 177 (48.8)                          |                      |
| ≥80                                   | 270 (24.4)                             | 9 (2.5)                             |                      |
| Mean (SD)                             | 72.2 (10.4)                            | 64.0 (9.7)                          | <b>&lt;0.001</b>     |
| <b>Body Mass Index at Diagnosis</b>   |                                        |                                     |                      |
| Normal weight (≤24.9)                 | 303 (27.4)                             | 85 (23.4)                           | 0.16                 |
| Overweight (25.0-29.9)                | 448 (40.5)                             | 150 (41.3)                          |                      |
| Obese (≥30.0)                         | 356 (32.2)                             | 128 (35.3)                          |                      |

|                                                                             |                 |               |        |
|-----------------------------------------------------------------------------|-----------------|---------------|--------|
| Mean (SD)                                                                   | 28.5 (5.7)      | 28.9 (5.7)    | 0.17   |
| <b>Marital Status</b>                                                       |                 |               |        |
| Never married                                                               | 45 (4.1)        | 28 (7.7)      | <0.001 |
| Married or living as married                                                | 777 (70.2)      | 247 (68.0)    |        |
| Separated/Divorced                                                          | 133 (12)        | 68 (18.7)     |        |
| Widowed                                                                     | 143 (12.9)      | 19 (5.2)      |        |
| Unknown                                                                     | 9 (0.8)         | 1 (0.3)       |        |
| <b>Educational Attainment</b>                                               |                 |               |        |
| High school or less                                                         | 185 (16.7)      | 65 (17.9)     | 0.30   |
| Some college                                                                | 365 (33)        | 139 (38.3)    |        |
| College graduate                                                            | 303 (27.4)      | 90 (24.8)     |        |
| Post-graduate                                                               | 241 (21.8)      | 63 (17.4)     |        |
| Unknown                                                                     | 13 (1.2)        | 6 (1.7)       |        |
| <b>Household Income</b>                                                     |                 |               |        |
| <\$60K                                                                      | 353 (31.9)      | 104 (28.7)    | 0.10   |
| \$60K-99K                                                                   | 264 (23.9)      | 82 (22.6)     |        |
| ≥\$100K                                                                     | 349 (31.5)      | 144 (39.7)    |        |
| Unknown                                                                     | 141 (12.7)      | 33 (9.1)      |        |
| <b>Alcohol Consumption</b>                                                  |                 |               |        |
| None                                                                        | 269 (24.3)      | 66 (18.2)     | 0.06   |
| Rare (a few times per year, once per month)                                 | 187 (16.9)      | 49 (13.5)     |        |
| Occasional (2-3 times per month, once per week, twice per week)             | 180 (16.3)      | 55 (15.2)     |        |
| Regular (3-4 times per week, 5-6 times per week, every day)                 | 266 (24)        | 107 (29.5)    |        |
| Unknown (No FFQ available)                                                  | 205 (18.5)      | 86 (23.7)     |        |
| <b>Dietary Folate (mcg)</b>                                                 |                 |               |        |
| Mean (SD)                                                                   | 294.50 (143.21) | 325.2 (163.4) | 0.003  |
| <b>Overall Exposure to Chemical or Environmental Exposures<sup>b</sup></b>  |                 |               |        |
| Never                                                                       | 384 (34.7)      | 88 (24.2)     | <0.001 |
| Ever                                                                        | 723 (65.3)      | 275 (75.8)    |        |
| <b>Occupation Involving Chemical or Environmental Exposures<sup>c</sup></b> |                 |               |        |
| Never                                                                       | 760 (68.7)      | 197 (54.3)    | <0.001 |
| Ever                                                                        | 347 (31.4)      | 166 (45.7)    |        |
| <b>Tobacco Smoking Status</b>                                               |                 |               |        |
| Non-tobacco smokers                                                         | 358 (32.3)      | 71 (19.6)     | <0.001 |
| Tobacco Smokers                                                             | 209 (18.9)      | 89 (24.5)     |        |
| Cigarette Smokers Only                                                      | 540 (48.8)      | 203 (55.9)    |        |
| <b>Duration in Years</b>                                                    |                 |               |        |
| <10 years                                                                   | n/a             | 165 (45.5)    | n/a    |
| 10-19 years                                                                 | n/a             | 65 (17.9)     |        |

|                                                                                                                                                                                                                                                                                         |     |                     |  |
|-----------------------------------------------------------------------------------------------------------------------------------------------------------------------------------------------------------------------------------------------------------------------------------------|-----|---------------------|--|
| 20-29 years                                                                                                                                                                                                                                                                             | n/a | 29 (8.0)            |  |
| 30-39 years                                                                                                                                                                                                                                                                             | n/a | 37 (10.2)           |  |
| >40 years                                                                                                                                                                                                                                                                               | n/a | 62 (17.1)           |  |
| Unknown                                                                                                                                                                                                                                                                                 | n/a | 5 (1.4)             |  |
| Mean (SD, min-max)                                                                                                                                                                                                                                                                      | n/a | 17.0 (16.9, 0-73.0) |  |
| n/a = not applicable                                                                                                                                                                                                                                                                    |     |                     |  |
| <sup>a</sup> From Pearson chi-square test to compare smoking exposure categories with categorical variables or Fisher exact test for continuous variables                                                                                                                               |     |                     |  |
| <sup>b</sup> Includes asbestos, chemicals/acids/solvents, coal/stone dusts, coal tar/pitch/asphalt, diesel engine exhaust, dyes, formaldehyde, gasoline exhaust, pesticides/herbicides, textile fibers/dusts, wood dust, x-rays/radioactive materials, smoke other than from cigarettes |     |                     |  |
| <sup>c</sup> Includes coal miner, furniture maker, hairdresser, nail salon worker, machinist, painter, printer, truck/taxi/bus driver, leather industry worker, rubber industry worker, paint industry worker, textile industry worker                                                  |     |                     |  |

**eTable 3.** Associations Between Smoking Behaviors and Risk of Progression in the Be-Well Study

| CIGARETTE SMOKING                                                                  | Total N | Events N | Progression (n=89)   |           |                        |           |
|------------------------------------------------------------------------------------|---------|----------|----------------------|-----------|------------------------|-----------|
|                                                                                    |         |          | Model 1 <sup>a</sup> |           | Model 2 <sup>b,c</sup> |           |
|                                                                                    |         |          | HR                   | 95% CI    | HR                     | 95% CI    |
| <b>Cigarette Smoking</b>                                                           |         |          |                      |           |                        |           |
| Never                                                                              | 487     | 34       | Ref                  |           | Ref                    |           |
| Ever                                                                               | 985     | 55       | 0.75                 | 0.46-1.23 | 0.85                   | 0.51-1.43 |
| <b>Cigarette Smoking</b>                                                           |         |          |                      |           |                        |           |
| Never                                                                              | 487     | 34       | Ref                  |           | Ref                    |           |
| Former                                                                             | 874     | 50       | 0.76                 | 0.46-1.24 | 0.84                   | 0.50-1.42 |
| Current                                                                            | 111     | 5        | 0.72                 | 0.26-1.99 | 0.95                   | 0.34-2.65 |
| <b>Cigarette Smoking Duration (among smokers)</b>                                  |         |          |                      |           |                        |           |
| 1-19 years                                                                         | 353     | 14       | Ref                  |           | Ref                    |           |
| 20-39 years                                                                        | 396     | 26       | 1.42                 | 0.71-2.83 | 1.29                   | 0.61-2.70 |
| ≥40 years                                                                          | 235     | 14       | 1.33                 | 0.59-2.99 | 1.36                   | 0.57-3.24 |
| p for trend                                                                        |         |          |                      | 0.45      |                        | 0.47      |
| <b>Cigarette Smoking Intensity (among smokers)</b>                                 |         |          |                      |           |                        |           |
| 1-19 cigarettes                                                                    | 440     | 21       | Ref                  |           | Ref                    |           |
| 20-29 cigarettes                                                                   | 344     | 20       | 1.02                 | 0.54-1.94 | 0.97                   | 0.49-1.91 |
| ≥30 cigarettes                                                                     | 193     | 13       | 1.10                 | 0.52-2.34 | 1.021                  | 0.45-2.28 |
| p for trend                                                                        |         |          |                      | 0.58      |                        | 0.72      |
| <b>Pack-Years (among smokers)</b>                                                  |         |          |                      |           |                        |           |
| <20                                                                                | 462     | 19       | Ref                  |           | Ref                    |           |
| 20-39                                                                              | 286     | 21       | 1.49                 | 0.76-2.93 | 1.53                   | 0.75-3.12 |
| ≥40                                                                                | 229     | 14       | 1.15                 | 0.54-2.44 | 1.11                   | 0.49-2.48 |
| p for trend                                                                        |         |          |                      | 0.65      |                        | 0.73      |
| <b>Years Since Quit Smoking Relative to NMIBC Diagnosis (among former smokers)</b> |         |          |                      |           |                        |           |
| Stopped ≥20 years ago                                                              | 583     | 30       | Ref                  |           | Ref                    |           |
| Stopped 10-19 years ago                                                            | 121     | 8        | 1.20                 | 0.50-2.84 | 1.16                   | 0.45-2.98 |
| Stopped 1-9 years ago                                                              | 116     | 8        | 1.85                 | 0.79-4.33 | 1.82                   | 0.73-4.55 |
| Stopped < 1 year ago                                                               | 50      | 2        | 0.71                 | 0.15-3.30 | 1.04                   | 0.19-5.56 |
| <b>OTHER TOBACCO USE AND E-CIGARETTE USE</b>                                       |         |          |                      |           |                        |           |
| OTHER TOBACCO USE AND E-CIGARETTE USE                                              | Total N | Events N | Progression (n=89)   |           |                        |           |
|                                                                                    |         |          | Model 1 <sup>a</sup> |           | Model 2 <sup>b,c</sup> |           |
|                                                                                    |         |          | HR                   | 95% CI    | HR                     | 95% CI    |
| <b>Tobacco Smoking (cigarettes, pipes, and/or cigars)</b>                          |         |          |                      |           |                        |           |
| Never                                                                              | 429     | 138      | Ref                  |           | Ref                    |           |
| Ever                                                                               | 1,043   | 335      | 0.75                 | 0.46-1.23 | 0.85                   | 0.51-1.43 |



|                                                                                                                                                                                                                                                                                                                                                                                                                          |                |                 |                            |                  |                              |           |               |
|--------------------------------------------------------------------------------------------------------------------------------------------------------------------------------------------------------------------------------------------------------------------------------------------------------------------------------------------------------------------------------------------------------------------------|----------------|-----------------|----------------------------|------------------|------------------------------|-----------|---------------|
| <b>Pipe Smoking</b>                                                                                                                                                                                                                                                                                                                                                                                                      |                |                 |                            |                  |                              |           |               |
| Never                                                                                                                                                                                                                                                                                                                                                                                                                    | 1,255          | 80              | Ref                        |                  |                              | Ref       |               |
| Ever                                                                                                                                                                                                                                                                                                                                                                                                                     | 217            | 9               | 0.54                       | 0.26-1.15        |                              | 0.50      | 0.22-1.11     |
| <b>Cigar Smoking</b>                                                                                                                                                                                                                                                                                                                                                                                                     |                |                 |                            |                  |                              |           |               |
| Never                                                                                                                                                                                                                                                                                                                                                                                                                    | 1,328          | 80              | Ref                        |                  |                              | Ref       |               |
| Ever                                                                                                                                                                                                                                                                                                                                                                                                                     | 144            | 9               | 0.88                       | 0.40-1.92        |                              | 0.91      | 0.39-2.13     |
| <b>E-cigarette Smoking</b>                                                                                                                                                                                                                                                                                                                                                                                               |                |                 |                            |                  |                              |           |               |
| Never                                                                                                                                                                                                                                                                                                                                                                                                                    | 1,407          | 86              | Ref                        |                  |                              | Ref       |               |
| Ever                                                                                                                                                                                                                                                                                                                                                                                                                     | 65             | 3               | 1.10                       | 0.33-3.71        |                              | 1.05      | 0.24-4.60     |
| <b>MARIJUANA USE</b>                                                                                                                                                                                                                                                                                                                                                                                                     | <b>Total N</b> | <b>Events N</b> | <b>Progression (n=89)</b>  |                  |                              |           |               |
|                                                                                                                                                                                                                                                                                                                                                                                                                          |                |                 | <b>Model 1<sup>a</sup></b> |                  | <b>Model 2<sup>b,c</sup></b> |           |               |
|                                                                                                                                                                                                                                                                                                                                                                                                                          |                |                 | <b>HR</b>                  | <b>95% CI</b>    |                              | <b>HR</b> | <b>95% CI</b> |
| <b>Marijuana‡</b>                                                                                                                                                                                                                                                                                                                                                                                                        |                |                 |                            |                  |                              |           |               |
| Never                                                                                                                                                                                                                                                                                                                                                                                                                    | 1,107          | 72              | Ref                        |                  |                              | Ref       |               |
| Former                                                                                                                                                                                                                                                                                                                                                                                                                   | 242            | 12              | 1.12                       | 0.58-2.15        |                              | 1.03      | 0.51-2.08     |
| Current                                                                                                                                                                                                                                                                                                                                                                                                                  | 121            | 5               | 0.84                       | 0.33-2.14        |                              | 0.71      | 0.24-2.07     |
| <b>Marijuana and Any Tobacco</b>                                                                                                                                                                                                                                                                                                                                                                                         |                |                 |                            |                  |                              |           |               |
| No tobacco/marijuana use                                                                                                                                                                                                                                                                                                                                                                                                 | 358            | 29              | Ref                        |                  |                              | Ref       |               |
| Tobacco use only                                                                                                                                                                                                                                                                                                                                                                                                         | 749            | 43              | <b>0.56</b>                | <b>0.33-0.95</b> |                              | 0.65      | 0.37-1.15     |
| Marijuana use only                                                                                                                                                                                                                                                                                                                                                                                                       | 71             | 1               | 0.22                       | 0.03-1.65        |                              | 0.28      | 0.04-2.11     |
| Tobacco and marijuana use                                                                                                                                                                                                                                                                                                                                                                                                | 292            | 16              | 0.70                       | 0.36-1.36        |                              | 0.71      | 0.34-1.47     |
| <sup>a</sup> Model 1: Adjusted for age at diagnosis, sex, race/ethnicity, BMI at diagnosis, stage/grade, chemotherapy, immunotherapy, AUA risk stratification category, educational attainment, and household income                                                                                                                                                                                                     |                |                 |                            |                  |                              |           |               |
| <sup>b</sup> Model 2: Adjusted for covariates in Model 1 + alcohol intake, dietary folate, overall chemical or environmental exposures, occupation involving chemical or environmental exposures                                                                                                                                                                                                                         |                |                 |                            |                  |                              |           |               |
| <sup>c</sup> For cigarette smoking, Models 1 and 2 also adjusted for ever/never cigar and pipe, marijuana, and e-cigarettes. For pipe, cigar, and e-cigarette, Models 1 and 2 also adjusted for ever/never cigarette, pipe (if applicable), cigar (if applicable), and e-cigarettes (if applicable). For marijuana, Models 1 and 2 also adjusted for ever/never cigarette, pipe, cigar, and e-cigarettes as appropriate. |                |                 |                            |                  |                              |           |               |
