# Supplementary material for: Smoking Behaviors and Prognosis in Patients With Non–Muscle-Invasive Bladder Cancer in the Be-Well Study
Source: PubMed Central journal article supplement (PMC9713602; doi:10.1001/jamanetworkopen.2022.44430), 2022-11-30
Supplement: jamanetwopen-e2244430-s002.pdf [file jamanetwopen-e2244430-s002.pdf]

## Data Sharing Statement

Kwan. Smoking Behaviors and Prognosis in Patients With Non-Muscle-Invasive Bladder Cancer in the Be-Well Study. *JAMA Netw Open*. Published November 30, 2022.  
doi:10.1001/jamanetworkopen.2022.44430

### Data

**Data available:** No

### Additional Information

**Explanation for why data not available:** Any interested individuals are welcome to contact us for further discussion.
